# Supplementary material
Source: Springer Nature journal article supplement (https://www.springermedizin.de/resource/supplementary/12906_2013_1375_MOESM3_ESM.pdf/9521750)

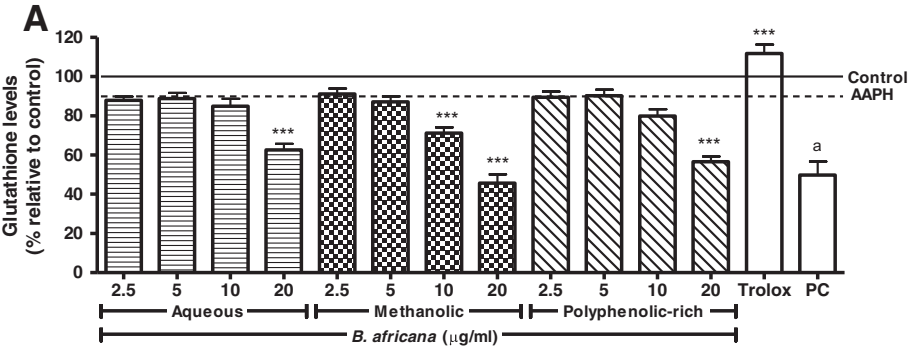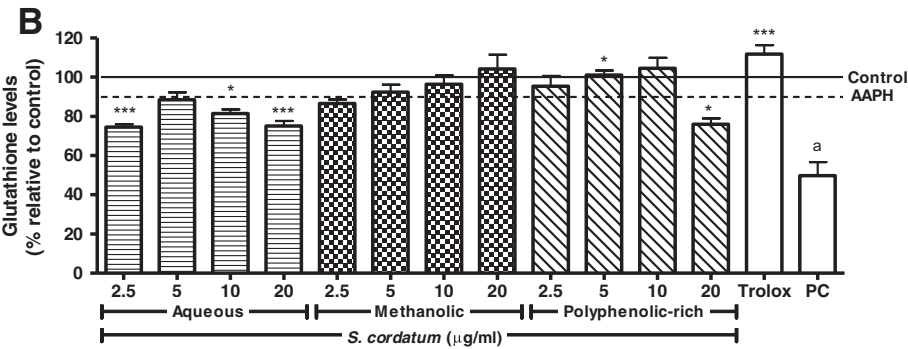

Supplement: MOESM3 [file 9521750]
